# Supplementary material for: Reversible Single Spin Control of Individual Magnetic Molecule by Hydrogen Atom Adsorption
Source: Springer Nature journal article supplement (doi:10.1038/srep01210), 2013-02-04
Supplement: srep01210-s1.pdf [file srep01210-s1.pdf]

Reversible Single Spin Control of Individual Magnetic Molecule by Hydrogen Atom Adsorption | Scientific Reports


Skip to main content

Thank you for visiting nature.com. You are using a browser version with limited support for CSS. To obtain
the best experience, we recommend you use a more up to date browser (or turn off compatibility mode in
Internet Explorer). In the meantime, to ensure continued support, we are displaying the site without styles
and JavaScript.

Advertisement

- View all journals
- Search
- My Account

  Login

- Explore content
- About the journal
- Publish with us

- Sign up for alerts
- RSS feed


1. nature
2. scientific reports
3. articles
4. article

Reversible Single Spin Control of Individual Magnetic Molecule by Hydrogen Atom Adsorption

Download PDF

Download PDF

- Article
- Open access
- Published: 04 February 2013

# Reversible Single Spin Control of Individual Magnetic Molecule by Hydrogen Atom Adsorption

- Liwei Liu1na1,
- Kai Yang1na1,
- Yuhang Jiang1na1,
- Boqun Song1na1,
- Wende Xiao1na1,
- Linfei Li1na1,
- Haitao Zhou1na1,
- Yeliang Wang1na1,
- Shixuan Du1na1,
- Min Ouyang2na1,
- Werner A. Hofer1,3na1,
- Antonio H. Castro Neto4na1 &
- …
- Hong-Jun Gao1na1

Show authors

*Scientific Reports*
**volume 3**, Article number: 1210 (2013)
Cite this article

- 5794 Accesses
- 113 Citations
- Metrics details

### Subjects

- Electronic properties and materials
- Magnetic properties and materials
- Molecular electronics
- Spintronics

## Abstract

The reversible control of a single spin of an atom or a molecule is of great interest in Kondo physics and a potential application in spin based electronics. Here we demonstrate that the Kondo resonance of manganese phthalocyanine molecules on a Au(111) substrate have been reversibly switched off and on *via* a robust route through attachment and detachment of single hydrogen atom to the magnetic core of the molecule. As further revealed by density functional theory calculations, even though the total number of electrons of the Mn ion remains almost the same in the process, gaining one single hydrogen atom leads to redistribution of charges within 3*d* orbitals with a reduction of the molecular spin state from S = 3/2 to S = 1 that directly contributes to the Kondo resonance disappearance. This process is reversed by a local voltage pulse or thermal annealing to desorb the hydrogen atom.


### Similar content being viewed by others

### Reversible coordination-induced spin-state switching in complexes on metal surfaces

Article
23 December 2019

### Complete reversal of the atomic unquenched orbital moment by a single electron

Article
Open access
27 August 2020

### Molecular magnetism: from chemical design to spin control in molecules, materials and devices

Article
24 October 2019

## Introduction

Control over charge and spin states at the single molecule level is crucial not only for a fundamental understanding of charge and spin interactions but also represents a prerequisite for development of molecular electronics and spintronics1,2,3. While charge manipulation has been demonstrated by gas adsorption4 and atomic manipulation5, the reversible control of a single spin of an atom or a molecule has been challenging. Typically, atomic or molecular spin can be probed as a Kondo effect that manifests itself as a conductance anomaly at the Fermi level when it is coupled to a metallic system6,7. However, an effective method to manipulate molecular spin both individually and ensemble has been limited8. In this paper, we present the reversible control of a single spin in manganese phthalocyanine molecules on a Au(111) substrate. This process can be reversed by a local voltage pulse or thermal annealing to desorb the hydrogen atom, accompanied by a recovery of the molecular Kondo resonance.

Molecules with a single metal ion, including metal phthalocyanines (MPcs), metal porphyrins (MPs) and their derivatives, are ideal prototypes to study spin related phenomena due to their versatility and the tunability of charge and spin properties9,10. When magnetic MPcs or MPs are placed on metal surfaces, the Kondo resonance induced by the interaction between a localized spin of the molecule and conduction electrons from the substrate manifests itself as a narrow, pronounced peak in the density of states close to the Fermi level. While many attempts have been applied to govern the Kondo process, including conformation variation11,12,13,14,15, alteration of adsorption site16,17, quantum size effects18, ligand attachment19, molecular assembly20 and atomic doping21, most are either irreversible or cannot manipulate the Kondo effect at both single-molecule scale and ensemble; an effective method of molecular spin manipulation has been limited. We show that spin state of a single manganese phthalocyanine (MnPc) molecule on the Au(111) can be reversibly switched by chemical absorption and desorption of a single hydrogen atom. Our novel reversible spin control scheme can be easily realized at both ensemble of molecules and single-molecule level, which opens up new avenue of broader applications based on molecular spin state.

## Results

Figure 1a shows a typical low temperature scanning tunneling microscopy (LT-STM) image of MnPc molecules on an Au(111) substrate, in which every MnPc molecule possesses three inherent unpaired electrons with a total spin of *S* = 3/2. After deposition of 0.05 monolayer of MnPc onto a 22 × √3 herringbone reconstructed Au(111) surface, isolated MnPc molecules preferentially occupy the elbow and face centered cubic (fcc) sites. The STM image unambiguously confirms an intact molecular structure after thermal deposition with exhibition of a protruding “cross” feature with four-fold symmetry16,18. After the MnPc/Au(111) sample was dosed with 30 Langmuir (L) of H2 at room temperature (RT) and subsequently cooled down to 4.2 K, all molecules retained the cross feature but some showed a depression at the center. After extensive H2 dosage, all of the original MnPc molecules can be turned into molecules with a depression at the center (Fig. 1b and Supplementary Fig. 1).

**Figure 1**

Topography and *dI/dV* curves of the MnPc molecules on the Au(111) before and after hydrogen atom adsorption.

(a) Topography of the MnPc molecules on the Au(111) before hydrogen addition, showing molecules with bright center. Scanning bias: -0.2 V; Tunneling current: 10 pA; Scale bar, 5 nm. (Inset) High-resolution image of a single molecule. Scale bar, 0.7 nm. (b) Topography of the MnPc molecules after hydrogen atom decoration, showing some molecules with suppressed center. Scanning bias: −0.2 V; Tunneling current: 10 pA; Scale bar, 5 nm. (Inset) High-resolution image of a single molecule with suppressed center. Scale bar, 0.7 nm. (c) Sequential variation of the *dI/dV* spectra recorded at the center of a MnPc molecule induced by the absorption and desorption of a single hydrogen atom. For comparison purpose spectra were vertically shifted 0.1 nA/V and 0.33 nA/V for middle and upper curves, respectively. (d) *dI/dV* spectra acquired at the center of the MnPc molecule under external magnetic field at 0.4 K, showing the splitting of Kondo resonance. For clarity the successive spectra were vertically shifted by 0.1 nA/V.

Full size image

The variation of the molecular morphology after the H2 gas dosage can be attributed to the chemical adsorption of a single hydrogen atom onto the MnPc molecule, according to key control experiments summarized as follows: (1) This change of molecular morphology is reversible. We observed that by applying a positive voltage pulse (e.g. 2.0 V for one second with feedback loop off) the bright protrusion feature of the MnPc molecules can be recovered on a depression. This behavior is consistent with a tip induced detachment4 of adsorbates from the MnPc molecule. Alternatively, the depression feature can be switched back to a bright protrusion by thermal annealing of samples at 500 K for 10 mins. (2) The apparent height of the molecule remains unchanged when the H2 is dosed at 4.2 K instead of RT, even with very high dosage capacity (1000 L). We observed that intact H2 molecules can only reside around the MnPc molecules without modification of the intrinsic molecular structure (Supplementary Fig. 2). This suggests that the interaction between the H2 and the MnPc molecules is weak and absorption of molecular hydrogen cannot be the origin of the process demonstrated in the Fig. 1. (3) A threshold voltage of +1.28 V is required in order to detach the adsorbate from the host MnPc molecule (Supplementary Fig. 3). This threshold voltage suggests the binding between adsorbate and the molecule is chemical adsorption rather than physical adsorption, which demonstrates that the absorption of the H2 cannot be the origin of the process shown in the Fig. 1. (4) Lastly we also carried out one control experiment by direct dosage of atomic hydrogen gas22 (Supplementary Section 2.) and similar features of the molecular morphology change were also obtained. From these key experiments we conclude that the depression feature after dosage of hydrogen gas is due to adsorption of atomic hydrogen (labeled as “H-MnPc”).

We explored and compared in detail the difference of electronic structure between the MnPc and the H-MnPc states by measuring differential conductance (*dI/dV*) spectra. As shown in the upper red curve in Fig. 1c, the *dI/dV* spectra acquired at the center of the original MnPc molecules consistently show a pronounced step shaped feature at zero bias, regardless of the molecular adsorption configurations and locations on the Au terraces. Such step shaped feature in *dI/dV* spectra is very sharp and close to the Fermi level. This spectra feature manifests linear splitting at the presence of magnetic field (Fig. 1d) as well as temperature dependence (Supplementary Fig. 8) and thus it can be safely attributed to the Kondo resonance6,7,23,24. In contrast, the *dI/dV* spectra of the H-MnPc state (middle blue curve in Fig. 1c) are featureless in this energy range. Importantly, once the H-MnPc state was switched back to the MnPc state, its electronic structure including the Kondo resonance can be fully recovered (bottom red curve in Fig. 1c) in addition to the recovery of the topographic feature.

Further insight into the reversible switching of the Kondo resonance between the MnPc and the H-MnPc states can be gained by density functional theory (DFT) calculations (see Method for more details). Topographic features of both the MnPc and H-MnPc states can be well reproduced by STM simulations by integrating electron density from −0.4 eV to the Fermi level according to the Tersoff-Hamann approximation25. The projected density of states (PDOS) shows that the bright protrusion at the molecular center of MnPc is due to the *d*-orbital character of the Mn ion near the Fermi level (Fig. 2a and Supplementary Fig. 5). The calculated binding energy of 1.75 eV between the hydrogen atom and MnPc/Au(111) indicates that H on MnPc/Au(111) is of a chemical adsorption with binding energy in the same range of our experimental value. Therefore, both experimental results and theoretical calculations suggest that attaching and detaching a single hydrogen atom from the central Mn ion is the physical origin of spin switching process.

**Figure 2**

STM simulation and PDOS of the MnPc/Au(111) before and after hydrogen adsorption (a) STM simulation of the MnPc/Au(111) and the H-MnPc/Au(111), confirming the topographic feature in Fig. 1a and b.(b) and (c) PDOS of dxz, dyz and  orbitals of Mn ion in the MnPc/Au(111) and the H-MnPc/Au(111), respectively, revealing that spin at the Mn ion is reduced from 3/2 to 1. (d) Schematics of reversible control of molecular Kondo effect with adsorption (Kondo OFF) and desorption of hydrogen atom (Kondo ON).

Full size image

## Discussions

An analysis of the electronic structure of MnPc and H-MnPc reveals that the number of *d*-orbital electrons of the Mn ion remains almost unchanged. Thus the additional electron contributed by the hydrogen atom is donated to the Pc skeleton. However, the effective charges in individual *d* orbitals are redistributed. Before hydrogen adsorption, the Mn ion in the MnPc molecule has a net spin of S = 3/2. This is due to two partially paired orbitals, *d**xz* and *d**yz* and two unpaired orbitals, *d**xy* and  (Fig. 2b). The Kondo resonance observed in the *dI/dV* spectra in this case originates from an exchange interaction between the localized spin of the magnetic Mn ion and the conducting electrons of the Au(111) substrate26. After atomic hydrogen decoration (i.e., in the H-MnPc state), the spin polarization decreases in the  orbital: Before adsorption the spin-up charge in this state is close to one while the spin-down charge is close to zero. After adsorption the charge in both spin states is close to 1/2. This leads to a decrease of the net spin of the Mn ion from S = 3/2 to S = 1 (Fig. 2c). Because the Kondo effect strongly depends on the coupling between the localized spin and the conducting electrons, a reduced molecular spin state directly contributes to the suppression of the Kondo effect (Supplementary Section 4)27,28. A schematics of manipulation of the molecular Kondo effect by hydrogen adsorption and desorption is illustrated in Fig. 2d.

In principle, the appearance or disappearance of the Kondo resonance on this magnetic molecule can be seen as a single bit of information. This may have implications for information recording and storage at the ultimate molecular limit10,11,12,29,30,31, when combined with STM capability of atomic manipulation of molecular adsorption and desorption. We explore this avenue by investigating an ordered molecular array. Fig. 3a shows topography and *dI/dV* mapping acquired simultaneously from a 3 × 4 molecular array. All the MnPc molecules within the array are initialized by converting them to the H-MnPc state through the adsorption of hydrogen atoms, with evidence of featureless *dI/dV* mapping (i.e. absence of the Kondo resonance), while the four-lobe topographic structure of individual molecules remains (Fig. 3a). By applying voltage pulses on selected H-MnPc molecules, we can precisely address an individual molecule within the array and the H-MnPc molecules can be converted back to the MnPc state one-by-one. As a result, a pattern of confined dark dot feature corresponding to the Kondo resonance of the MnPc molecules can be created in the *dI/dV* mapping (Fig. 3b). Importantly, this process can be extended to an ultimate close-packed array with the highest molecular density (Supplementary Fig. 6 and Supplementary Fig. 7), with one example shown in the Fig. 3c. While the inter-molecular spacing is as small as 1.4 nm in a close-packed array, all the dark-dot features in the *dI/dV* mapping remain localized at the center of the MnPc molecules and the *dI/dV* spectra of the Kondo switching recorded in the molecular assembly show no difference from our observation of isolated molecules (Supplementary Fig. 7), regarding characteristic parameters such as the Fano factor (*q*) and the Kondo temperature (*T**K*). Correspondingly, no change occurs in the molecular framework during the spin manipulations within the molecular assembly, in contrast to previously investigated systems, which involve conformational changes at the periphery of the molecule11,13,14. A storage system based on the molecular spin states thus describes the ultimate limit of information storage. Furthermore, all the MnPc molecules in the arrays exhibit consistent Kondo features, suggesting a site-independent Kondo resonance and the inter-particle interactions can be weak enough to become negligible in the process. (Fig. 1 and Supplementary Fig. 7). Even more importantly, such molecular spin switching can be consistently achieved back-and-forth for many times with no observable change of the Kondo features. To substantiate the robustness of the spin switching process, we have quantified both *T**K* and *q* of MnPc state from a Fano fitting (Supplementary Fig. 8) and monitored both parameters during the spin switching process by repeatedly absorption and desorption of H-atom, with results summarized in the Fig. 3d. That both, the *T**K* and *q* values in the spin manipulation cycles remain constant supports the robustness of this process. Atomic localization feature of the Kondo resonance switching makes it possible to create more complex patterns based on molecular spin state, including one example of a digitalization from (000) to (111) that can be fabricated from a larger 3 × 8 molecular array (Supplementary Fig. 9).

**Figure 3**

Reversible spin switching in molecular arrays.

(a) The *dI/dV* mapping (upper panel) and simultaneously acquired topography (lower panel) of a H-MnPc molecular array (Kondo OFF state). (b) The *dI/dV* mapping (upper panel) and simultaneously acquired topography (lower panel) of the same molecular array as a but with a few selected molecules converted to the MnPc state (Kondo ON). For both (a) and (b), the *dI/dV* mappings were taken at 6 mV. Note that the MnPc state (Kondo ON) can be erased and converted back to H-MnPc state (Kondo OFF) by adsorption of additional hydrogen. (c) The *dI/dV* mapping (upper panel) and topography (lower panel) of a close-packed molecular array with pre-designed Kondo pattern by switching selected molecules from the H-MnPc to the MnPc states within the array. The *dI/dV* mapping was taken at 6 mV. (d) The Fano factor *q* and Kondo temperature *T**K* of Kondo ON states after multiple-cycles of spin switching, indicating the robustness of the spin manipulation process.

Full size image

The ability to reversibly tune the Kondo effect at the molecule level by gaining or losing a single hydrogen atom creates a new class of simplest molecular Kondo system in which the spin screen can be manipulated directly through the control of the local atomic environment. Our demonstration of reversible molecular spin control by chemical stimuli is different from a few recent works in that it offers an in-situ single molecule characterization and control instead of ensemble measurement32 and selection of noble metallic Au substrate can further avoid complex spin texture of substrate due to Rashba type spin-split pair surface states of a semimetal of such as Bi33,34. Even more importantly, our scheme can allow not only ensemble spin manipulation (such as Kondo ON/OFF switching of all molecules by thermal annealing and H2 gas dosage, respectively) but also control at the single-molecule level by atomic manipulation of single H atom that has not been achieved so far21. It thus opens up a variety of avenues. Our approach can be readily extended to more complex magnetic molecules. The atomically precise engineering of molecular spin states provides a unique test ground for probing magnetic interactions at the single-molecule level. For example, the magnetism in transition-metal ions based magnetic molecules arises from unpaired spins residing in the *d*-orbitals. Controlled coupling of its net spins with another unpaired spin of a well-defined hydrogen atom provides the simplest conceivable systems potentially exhibiting quantum critical behavior. Our demonstration of robust Kondo switching in a molecular array could also be applied as nonvolatile classical information recording and storage at the ultimate molecule limit without the requirement of molecular conformation change. Future design of more complex molecular framework might offer a way to enable and tailor coherent spin coupling through such as inter-molecular bridge35.

## Methods

### Experimental method

Experiments were carried out in an ultrahigh vacuum (base pressure of 1 × 10−10 mbar) LT-STM system (Unisoku), equipped with standard surface processing facilities. An atomically flat Au(111) surface was prepared by repeated cycles of sputtering with argon ions and annealing at 800 K. Commercial MnPc molecules (Sigma-Aldrich, 97% purity) were sublimated from a Knudsen-type evaporator after thermal purification, while the Au(111) substrate was held at room temperature. One monolayer refers to a close-packed MnPc layer covering the whole Au(111) surface, as examined by STM (Supplementary Fig. 6). STM images were acquired in the constant-current mode with bias voltage applied to the sample. Spectroscopic measurements were performed by using a lock-in technique with a 0.5 mVrms sinusoidal modulation at a frequency of 973 Hz. Most images and spectra were obtained with electrochemically etched tungsten tips at 4.2 K, but the magnetic field dependent measurement was performed at 0.4 K. Measurements of local spectroscopy were electronically calibrated by performing *dI/dV* measurements on clean Au(111) before and after measurements on molecules, based on the well-known Au(111) surface state36. The atomic H is generated by cracking H2 molecules with hot tungsten filament, which is placed very close (~5 cm) to the sample.

### Calculation details

The DFT calculations were performed using Vienna ab-initio simulation package (VASP)37. Perdew-Wang 91 exchange correlation functionals and the projector augmented-wave method were employed38. The energy cutoff for plane-wave basis set was 400 eV. A *c*(7 × 8) supercell containing three layers of gold atoms was employed to model an isolated molecule on Au(111) substrate. To ensure that interactions between the periodic slabs through vacuum can be negligible, the slabs were separated by a vacuum gap of 20 Å. For geometry optimization, the bottom layer was fixed, while the adsorbates and the other metal layers were allowed to relax until the forces applied to the relaxed atoms were less than 0.01 eV/Å. A single Γ point was used in sampling the Brillouin zone due to the numerical limitations (See Supplementary Section 8).

## References

- Joachim, C., Gimzewski, J. K. & Aviram, A. Electronics using hybrid-molecular and mono-molecular devices. Nature 408, 541–548 (2000).

  Article 
  ADS 
  CAS 
  Google Scholar
- Moth-Poulsen, K. & Bjornholm, T. Molecular electronics with single molecules in solid-state devices. Nat. Nanotechnol. 4, 551–556 (2009).

  Article 
  ADS 
  CAS 
  Google Scholar
- Bogani, L. & Wernsdorfer, W. Molecular spintronics using single-molecule magnets. Nat. Mater. 7, 179–186 (2008).

  Article 
  ADS 
  CAS 
  Google Scholar
- Katano, S., Kim, Y., Hori, M., Trenary, M. & Kawai, M. Reversible Control of Hydrogenation of a Single Molecule. Science 316, 1883–1886 (2007).

  Article 
  ADS 
  CAS 
  Google Scholar
- Lee, H. J. & Ho, W. Single-bond formation and characterization with a scanning tunneling microscope. Science 286, 1719–1722 (1999).

  Article 
  CAS 
  Google Scholar
- Li, J. T., Schneider, W. D., Berndt, R. & Delley, B. Kondo scattering observed at a single magnetic impurity. Phys. Rev. Lett. 80, 2893–2896 (1998).

  Article 
  ADS 
  CAS 
  Google Scholar
- Madhavan, V., Chen, W., Jamneala, T., Crommie, M. F. & Wingreen, N. S. Tunneling into a single magnetic atom: Spectroscopic evidence of the Kondo resonance. Science 280, 567–569 (1998).

  Article 
  ADS 
  CAS 
  Google Scholar
- Ham, U. & Ho, W. Spin Splitting Unconstrained by Electron Pairing: The Spin-Vibronic States. Phys. Rev. Lett. 108, 106803 (2012).

  Article 
  ADS 
  Google Scholar
- Atodiresei, N. et al. Design of the Local Spin Polarization at the Organic-Ferromagnetic Interface. Phys. Rev. Lett. 105, 066601 (2010).

  Article 
  ADS 
  Google Scholar
- Wang, Y. F., Kroger, J., Berndt, R. & Hofer, W. A. Pushing and Pulling a Sn Ion through an Adsorbed Phthalocyanine Molecule. J. Am. Chem. Soc. 131, 3639–3643 (2009).

  Article 
  CAS 
  Google Scholar
- Iancu, V., Deshpande, A. & Hla, S.-W. Manipulating Kondo Temperature via Single Molecule Switching. Nano Lett. 6, 820–823 (2006).

  Article 
  ADS 
  CAS 
  Google Scholar
- Komeda, T. et al. Observation and electric current control of a local spin in a single-molecule magnet. Nat. Commun. 2, 217 (2011).

  Article 
  ADS 
  Google Scholar
- Miyamachi, T. et al. Robust spin crossover and memristance across a single molecule. Nat. Commun. 3, 938 (2012).

  Article 
  ADS 
  Google Scholar
- Zhao, A. D. et al. Controlling the Kondo Effect of an Adsorbed Magnetic Ion Through Its Chemical Bonding. Science 309, 1542–1544 (2005).

  Article 
  ADS 
  CAS 
  Google Scholar
- Choi, T. et al. A Single Molecule Kondo Switch: Multistability of Tetracyanoethylene on Cu(111). Nano Lett. 10, 4175–4180 (2010).

  Article 
  ADS 
  CAS 
  Google Scholar
- Franke, K. J., Schulze, G. & Pascual, J. I. Competition of Superconducting Phenomena and Kondo Screening at the Nanoscale. Science 332, 940–944 (2011).

  Article 
  ADS 
  CAS 
  Google Scholar
- Jiang, Y., Zhang, Y. N., Cao, J. X., Wu, R. Q. & Ho, W. Real-Space Imaging of Kondo Screening in a Two-Dimensional O-2 Lattice. Science 333, 324–328 (2011).

  Article 
  ADS 
  CAS 
  Google Scholar
- Fu, Y. S. et al. Manipulating the Kondo resonance through quantum size effects. Phys. Rev. Lett. 99, 256601 (2007).

  Article 
  ADS 
  Google Scholar
- Wahl, P. et al. Kondo Effect of Molecular Complexes at Surfaces: Ligand Control of the Local Spin Coupling. Phys. Rev. Lett. 95, 166601 (2005).

  Article 
  ADS 
  CAS 
  Google Scholar
- Iancu, V., Deshpande, A. & Hla, S. W. Manipulation of the Kondo effect via two-dimensional molecular assembly. Phys. Rev. Lett. 97, 266603 (2006).

  Article 
  ADS 
  Google Scholar
- Robles, R. et al. Spin Doping of Individual Molecules by Using Single-Atom Manipulation. Nano Lett. 12, 3609–3612 (2012).

  Article 
  ADS 
  CAS 
  Google Scholar
- Stobinski, L. & Dus, R. Molecular-Hydrogen Chemisorption on Thin Unsintered Gold-Films Deposited at Low-Temperature. Surf. Sci. 298, 101–106 (1993).

  Article 
  ADS 
  CAS 
  Google Scholar
- Fano, U. Effects of Configuration Interaction on Intensities and Phase Shifts. Phys Rev 124, 1866 (1961).

  Article 
  ADS 
  CAS 
  Google Scholar
- Manoharan, H. C., Lutz, C. P. & Eigler, D. M. Quantum mirages formed by coherent projection of electronic structure. Nature 403, 512–515 (2000).

  Article 
  ADS 
  CAS 
  Google Scholar
- Tersoff, J. & Hamann, D. R. Theory and Application for the Scanning Tunneling Microscope. Phys. Rev. Lett. 50, 1998–2001 (1983).

  Article 
  ADS 
  CAS 
  Google Scholar
- Gao, L. et al. Site-specific Kondo effect at ambient temperatures in iron-based molecules. Phys. Rev. Lett. 99, 106402 (2007).

  Article 
  ADS 
  CAS 
  Google Scholar
- Posazhennikova, A., Bayani, B. & Coleman, P. Conductance of a spin-1 quantum dot: The two-stage Kondo effect. Phys. Rev. B 75, 245329 (2007).

  Article 
  ADS 
  Google Scholar
- Otte, A. F. et al. The role of magnetic anisotropy in the Kondo effect. Nat. Phys. 4, 847–850 (2008).

  Article 
  CAS 
  Google Scholar
- Nakaya, M., Tsukamoto, S., Kuwahara, Y., Aono, M. & Nakayama, T. Molecular Scale Control of Unbound and Bound C-60 for Topochemical Ultradense Data Storage in an Ultrathin C-60 Film. Adv. Mater. (Weinheim, Ger.) 22, 1622 (2010).

  Article 
  CAS 
  Google Scholar
- Donhauser, Z. J. et al. Conductance switching in single molecules through conformational changes. Science 292, 2303–2307 (2001).

  Article 
  CAS 
  Google Scholar
- Liljeroth, P., Repp, J. & Meyer, G. Current-induced hydrogen tautomerization and conductance switching of naphthalocyanine molecules. Science 317, 1203–1206 (2007).

  Article 
  ADS 
  CAS 
  Google Scholar
- Wäckerlin, C. et al. Controlling spins in adsorbed molecules by a chemical switch. Nat. Commun. 1, 61–67 (2010).

  Article 
  ADS 
  Google Scholar
- Stróżecka, A., Soriano, M., Pascual, J. I. & Palacios, J. J. Reversible Change of the Spin State in a Manganese Phthalocyanine by Coordination of CO Molecule. Phys. Rev. Lett. 109, 147202 (2012).

  Article 
  ADS 
  Google Scholar
- Pascual, J. I. et al. Role of spin in quasiparticle interference. Phys. Rev. Lett. 93, 196802 (2004).

  Article 
  ADS 
  CAS 
  Google Scholar
- Ouyang, M. & Awschalom, D. D. Coherent spin transfer between molecularly bridged quantum dots. Science 301, 1074–1078 (2003).

  Article 
  ADS 
  CAS 
  Google Scholar
- Chen, W., Madhavan, V., Jamneala, T. & Crommie, M. F. Scanning tunneling microscopy observation of an electronic superlattice at the surface of clean gold. Phys. Rev. Lett. 80, 1469–1472 (1998).

  Article 
  ADS 
  CAS 
  Google Scholar
- Kresse, G. Ab-Initio Molecular-Dynamics for Liquid-Metals. Phys. Rev. B 47, 558 (1995).

  Article 
  ADS 
  Google Scholar
- Kresse, G. & Joubert, D. From ultrasoft pseudopotentials to the projector augmented-wave method. Phys. Rev. B 59, 1758–1775 (1999).

  Article 
  ADS 
  CAS 
  Google Scholar

Download references

## Acknowledgements

The authors would like to thank Wilson Ho for helpful discussion. G. Li, L. Meng, L.H. Yan and X.M. Fei for experimental assistance. Work at IOP was supported by grants from National Natural Science Foundation of China (grant 10834011, 60921092), National “973” projects of China (grant 2009CB929103, 2011CB921702), the Chinese Academy of Sciences and SSC. Work in Liverpool is supported by the EPSRC Car-Parinello consortium, grant No EP/F037783/1. M.O. acknowledged support from the ONR (award #: N000141110080). AHCN acknowledges DOE grant DE-FG02-08ER46512, ONR grant MURI N00014-09-1-1063 and the NRF award R-144-000-295-281.

## Author information

Author notes

1. Liu Liwei, Yang Kai and Jiang Yuhang contributed equally to this work.

### Authors and Affiliations

1. Institute of Physics, Chinese Academy of Sciences, P.O. Box 603, Beijing, 100190, China

   Liwei Liu, Kai Yang, Yuhang Jiang, Boqun Song, Wende Xiao, Linfei Li, Haitao Zhou, Yeliang Wang, Shixuan Du, Werner A. Hofer & Hong-Jun Gao
2. Department of Physics and Center for Nanophysics and Advanced Materials, University of Maryland, College Park, MD, 20742, USA

   Min Ouyang
3. Department of Physics, The University of Liverpool, Liverpool, L69 3BX, UK

   Werner A. Hofer
4. Department of Physics, Graphene Research Centre, National University of Singapore, 117542, Singapore

   Antonio H. Castro Neto

Authors

1. Liwei Liu

   View author publications

   You can also search for this author in
   PubMed Google Scholar
2. Kai Yang

   View author publications

   You can also search for this author in
   PubMed Google Scholar
3. Yuhang Jiang

   View author publications

   You can also search for this author in
   PubMed Google Scholar
4. Boqun Song

   View author publications

   You can also search for this author in
   PubMed Google Scholar
5. Wende Xiao

   View author publications

   You can also search for this author in
   PubMed Google Scholar
6. Linfei Li

   View author publications

   You can also search for this author in
   PubMed Google Scholar
7. Haitao Zhou

   View author publications

   You can also search for this author in
   PubMed Google Scholar
8. Yeliang Wang

   View author publications

   You can also search for this author in
   PubMed Google Scholar
9. Shixuan Du

   View author publications

   You can also search for this author in
   PubMed Google Scholar
10. Min Ouyang

    View author publications

    You can also search for this author in
    PubMed Google Scholar
11. Werner A. Hofer

    View author publications

    You can also search for this author in
    PubMed Google Scholar
12. Antonio H. Castro Neto

    View author publications

    You can also search for this author in
    PubMed Google Scholar
13. Hong-Jun Gao

    View author publications

    You can also search for this author in
    PubMed Google Scholar

### Contributions

L.W.L., K.Y. and Y.H.J. contribute equally to this work. L.W.L., K.Y., Y.H.J., W.D.X., L.F.L., H.T.Z. and Y.L.W. performed STM measurements with the help of H.-J.G., B.Q.S., S.X.D. and W.A.H. conducted and supervised DFT calculations. L.W.L., S.X.D., M.O., W.D.X., W.A.H., A.H.C.N. and H.-J.G. analyzed the data and wrote the manuscript. H.-J.G. designed and coordinated the project. All authors discussed the results and commented on the manuscript.

## Ethics declarations

### Competing interests

The authors declare no competing financial interests.

## Electronic supplementary material

### Supplementary Information

Reversible Spin Control of Individual Magnetic Molecule by Hydrogen Atom Adsorption

## Rights and permissions

This work is licensed under a Creative Commons Attribution-NonCommercial-NoDerivs 3.0 Unported License. To view a copy of this license, visit http://creativecommons.org/licenses/by-nc-nd/3.0/

Reprints and permissions

## About this article

### Cite this article

Liu, L., Yang, K., Jiang, Y. *et al.* Reversible Single Spin Control of Individual Magnetic Molecule by Hydrogen Atom Adsorption.
*Sci Rep* **3**, 1210 (2013). https://doi.org/10.1038/srep01210

Download citation

- Received: 04 December 2012
- Accepted: 03 January 2013
- Published: 04 February 2013
- DOI: https://doi.org/10.1038/srep01210

### Share this article

Anyone you share the following link with will be able to read this content:

Get shareable link

Sorry, a shareable link is not currently available for this article.

Copy to clipboard

Provided by the Springer Nature SharedIt content-sharing initiative

## This article is cited by

- ### Atomic-scale visualization of chiral charge density wave superlattices and their reversible switching

  - Xuan Song
  - Liwei Liu
  - Yeliang Wang

  *Nature Communications* (2022)
- ### Reversible switching of Kondo resonance in a single-molecule junction

  - Yuqing Xing
  - Hui Chen
  - Hong-Jun Gao

  *Nano Research* (2022)
- ### Evolution and universality of two-stage Kondo effect in single manganese phthalocyanine molecule transistors

  - Xiao Guo
  - Qiuhao Zhu
  - Wenjie Liang

  *Nature Communications* (2021)
- ### Tunable giant magnetoresistance in a single-molecule junction

  - Kai Yang
  - Hui Chen
  - Hong-Jun Gao

  *Nature Communications* (2019)
- ### Translation of metal-phthalocyanines adsorbed on Au(111): from van der Waals interaction to strong electronic correlation

  - L. Buimaga-Iarinca
  - C. Morari

  *Scientific Reports* (2018)

## Comments

By submitting a comment you agree to abide by our Terms and Community Guidelines. If you find something abusive or that does not comply with our terms or guidelines please flag it as inappropriate.


Download PDF

Advertisement

## Explore content

- Research articles
- News & Comment
- Collections
- Subjects

- Follow us on Facebook
- Follow us on Twitter
- Sign up for alerts
- RSS feed


## About the journal

- Open Access Fees and Funding
- About Scientific Reports
- Contact
- Journal policies
- Calls for Papers
- Guide to referees
- Editor's Choice
- Journal highlights


## Publish with us

- For authors
- Language editing services
- Submit manuscript

## Search

Search articles by subject, keyword or author

Show results from

All journals
This journal

Search

Advanced search

### Quick links

- Explore articles by subject
- Find a job
- Guide to authors
- Editorial policies

Scientific Reports (*Sci Rep*)

ISSN 2045-2322 (online)

## nature.com sitemap

### About Nature Portfolio

- About us
- Press releases
- Press office
- Contact us

### Discover content

- Journals A-Z
- Articles by subject
- protocols.io
- Nature Index

### Publishing policies

- Nature portfolio policies
- Open access

### Author & Researcher services

- Reprints & permissions
- Research data
- Language editing
- Scientific editing
- Nature Masterclasses
- Research Solutions

### Libraries & institutions

- Librarian service & tools
- Librarian portal
- Open research
- Recommend to library

### Advertising & partnerships

- Advertising
- Partnerships & Services
- Media kits
- Branded
  content

### Professional development

- Nature Careers
- Nature 
  Conferences

### Regional websites

- Nature Africa
- Nature China
- Nature India
- Nature Italy
- Nature Japan
- Nature Middle East

- Privacy
  Policy
- Use
  of cookies
- Your privacy choices/Manage cookies
- Legal
  notice
- Accessibility
  statement
- Terms & Conditions
- Your US state privacy rights

© 2024 Springer Nature Limited

xml version="1.0" encoding="UTF-8"?

Close banner

Close

Sign up for the *Nature Briefing* newsletter — what matters in science, free to your inbox daily.

Email address

Sign up

I agree my information will be processed in accordance with the *Nature* and Springer Nature Limited Privacy Policy.

Close banner

Close

Get the most important science stories of the day, free in your inbox.
Sign up for Nature Briefing
